# Supplementary figures and images for: NODAL inhibition promotes differentiation of pacemaker-like cardiomyocytes from human induced pluripotent stem cells
Source: PubMed Central journal article supplement — Stem Cell Res. Author manuscript; Available in PMC 2021 Jan 19. (PMC7814970; doi:10.1016/j.scr.2020.102043), 2020-10-12

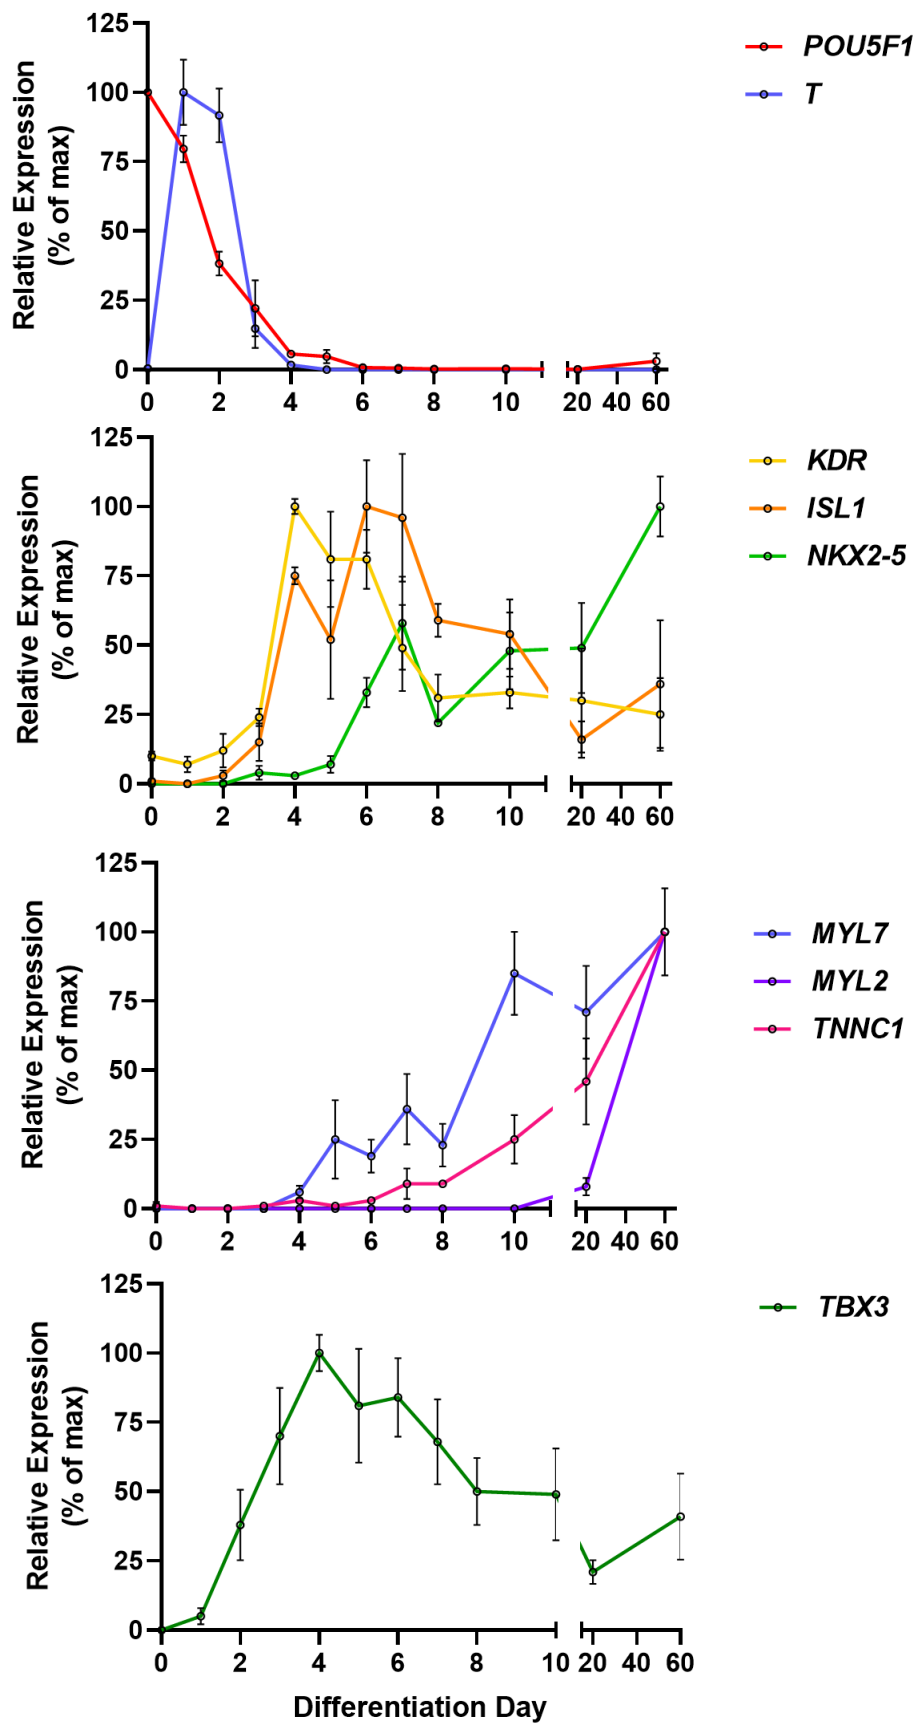

Figure S1

Supplement: NIHMS1658022-supplement-3.pdf [file NIHMS1658022-supplement-3.pdf]

**A**

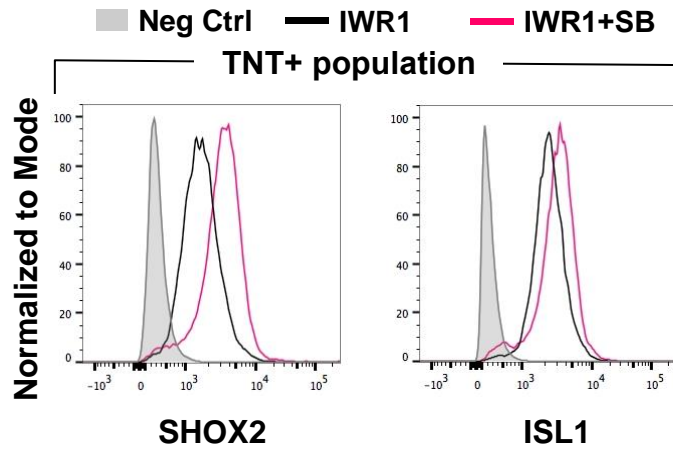

**B**

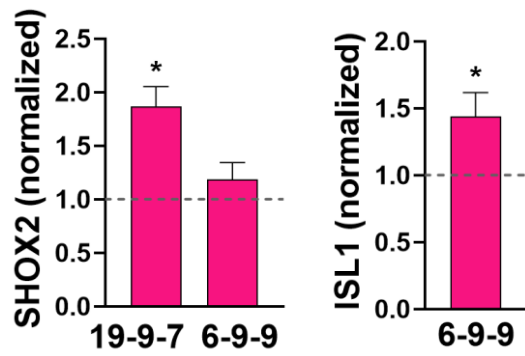

Supplement: NIHMS1658022-supplement-4.pdf [file NIHMS1658022-supplement-4.pdf]
